# Supplementary material for: Fecundability and Sterility by Age: Estimates Using Time to Pregnancy Data of Japanese Couples Trying to Conceive Their First Child with and without Fertility Treatment
Source: MDPI journal article supplement (doi:10.3390/ijerph18105486), 2021-05-20
Supplement: s1 [file s1]

Supplementary Table S1. Basic characteristics of the analytic sample by age category at the start of TTP shown as proportions (%) (n=1264).

|                                                                         | Total | Age (year) at the start of TTP |                  |                  |                  |               |
|-------------------------------------------------------------------------|-------|--------------------------------|------------------|------------------|------------------|---------------|
|                                                                         |       | 24 or younger<br>(n=91)        | 25-29<br>(n=561) | 30-34<br>(n=417) | 35-39<br>(n=174) | 40+<br>(n=21) |
| All                                                                     | 100   | 100                            | 100              | 100              | 100              | 100           |
| Partnership status                                                      |       |                                |                  |                  |                  |               |
| No partner                                                              | 1     | 0                              | 1                | 0                | 1                | 0             |
| Partnered, not engaged                                                  | 1     | 1                              | 1                | 1                | 1                | 10            |
| Partnered, engaged                                                      | 2     | 2                              | 2                | 2                | 3                | 10            |
| Married                                                                 | 95    | 95                             | 95               | 96               | 94               | 76            |
| Widowed                                                                 | 0     | 0                              | 0                | 0                | 0                | 0             |
| Separated or divorced                                                   | 1     | 2                              | 2                | 1                | 1                | 5             |
| Eligibility group                                                       |       |                                |                  |                  |                  |               |
| Parous (group A)                                                        | 62    | 78                             | 70               | 56               | 52               | 14            |
| Nulliparous and currently pregnant (group B)                            | 13    | 11                             | 12               | 17               | 10               | 5             |
| Nulliparous, not currently pregnant, and at risk of pregnancy (group C) | 25    | 11                             | 19               | 27               | 39               | 81            |
| Age difference between participants and their partner                   |       |                                |                  |                  |                  |               |
| Partner younger                                                         | 21    | 12                             | 12               | 27               | 40               | 52            |
| Partner older by 0-9 years                                              | 72    | 75                             | 82               | 66               | 56               | 43            |
| Partner older by 10+ years                                              | 7     | 13                             | 6                | 6                | 5                | 5             |

|                                                 |    |     |     |    |    |     |
|-------------------------------------------------|----|-----|-----|----|----|-----|
| Parity                                          |    |     |     |    |    |     |
| 0                                               | 38 | 22  | 30  | 44 | 48 | 86  |
| 1                                               | 49 | 52  | 53  | 47 | 47 | 14  |
| 2                                               | 13 | 25  | 16  | 9  | 5  | 0   |
| 3                                               | 0  | 1   | 1   | 0  | 0  | 0   |
| 4                                               | 0  | 0   | 0   | 0  | 0  | 0   |
| 5                                               | 0  | 0   | 0   | 0  | 0  | 0   |
| Spontaneous abortion <sup>a</sup>               |    |     |     |    |    |     |
| Never                                           | 87 | 91  | 90  | 86 | 79 | 62  |
| Ever                                            | 13 | 9   | 10  | 14 | 21 | 38  |
| Stillbirth <sup>a</sup>                         |    |     |     |    |    |     |
| Never                                           | 99 | 100 | 100 | 99 | 98 | 100 |
| Ever                                            | 1  | 0   | 0   | 1  | 2  | 0   |
| Induced abortion <sup>a</sup>                   |    |     |     |    |    |     |
| Never                                           | 92 | 93  | 93  | 93 | 92 | 81  |
| Ever                                            | 8  | 7   | 7   | 7  | 8  | 19  |
| Educational background                          |    |     |     |    |    |     |
| Junior high school                              | 1  | 2   | 1   | 1  | 1  | 0   |
| Senior high school                              | 17 | 42  | 14  | 16 | 17 | 10  |
| Junior college                                  | 18 | 21  | 18  | 16 | 18 | 33  |
| College                                         | 15 | 9   | 14  | 14 | 21 | 38  |
| University                                      | 44 | 25  | 48  | 47 | 38 | 19  |
| Graduate                                        | 5  | 0   | 5   | 6  | 5  | 0   |
| Other                                           | 0  | 1   | 0   | 0  | 1  | 0   |
| Last method of contraception (multiple answers) |    |     |     |    |    |     |
| Condom                                          | 81 | 87  | 81  | 82 | 75 | 62  |
| Oral contraceptives                             | 7  | 2   | 9   | 6  | 6  | 5   |

|                                  |    |    |    |    |    |    |
|----------------------------------|----|----|----|----|----|----|
| Morning pill                     | 0  | 0  | 0  | 0  | 0  | 0  |
| Withdrawal                       | 19 | 22 | 16 | 20 | 22 | 43 |
| Calendar method                  | 5  | 5  | 5  | 5  | 4  | 0  |
| BBT method                       | 8  | 4  | 8  | 9  | 9  | 10 |
| Other contraceptive method       | 1  | 0  | 0  | 1  | 1  | 0  |
|                                  |    |    |    |    |    |    |
| Infertility treatment            |    |    |    |    |    |    |
| Ever                             | 18 | 5  | 12 | 23 | 29 | 52 |
| Never                            | 82 | 95 | 88 | 77 | 71 | 48 |
|                                  |    |    |    |    |    |    |
| Methods of infertility treatment |    |    |    |    |    |    |
| Timing method                    | 16 | 5  | 12 | 21 | 24 | 48 |
| Ovulation induction              | 10 | 3  | 8  | 12 | 12 | 33 |
| Artificial insemination          | 6  | 0  | 3  | 7  | 11 | 29 |
| <i>In vitro</i> fertilization    | 3  | 0  | 1  | 3  | 9  | 29 |
| Micro-insemination               | 3  | 0  | 1  | 3  | 9  | 19 |
| Other                            | 0  | 0  | 0  | 0  | 0  | 5  |

a Before the first birth for women in group A.

TTP: time to pregnancy
